# Supplementary material for: Oligodendrogliomas, IDH-mutant and 1p/19q-codeleted, arising during teenage years often lack TERT promoter mutation that is typical of their adult counterparts
Source: Springer Nature journal article supplement (doi:10.1186/s40478-018-0598-x), 2018-09-19
Supplement: MOESM2 [file 25666512]

Oligodendroglioma, IDH-mutant and 1p/19q-codeleted, from teenage patient #2

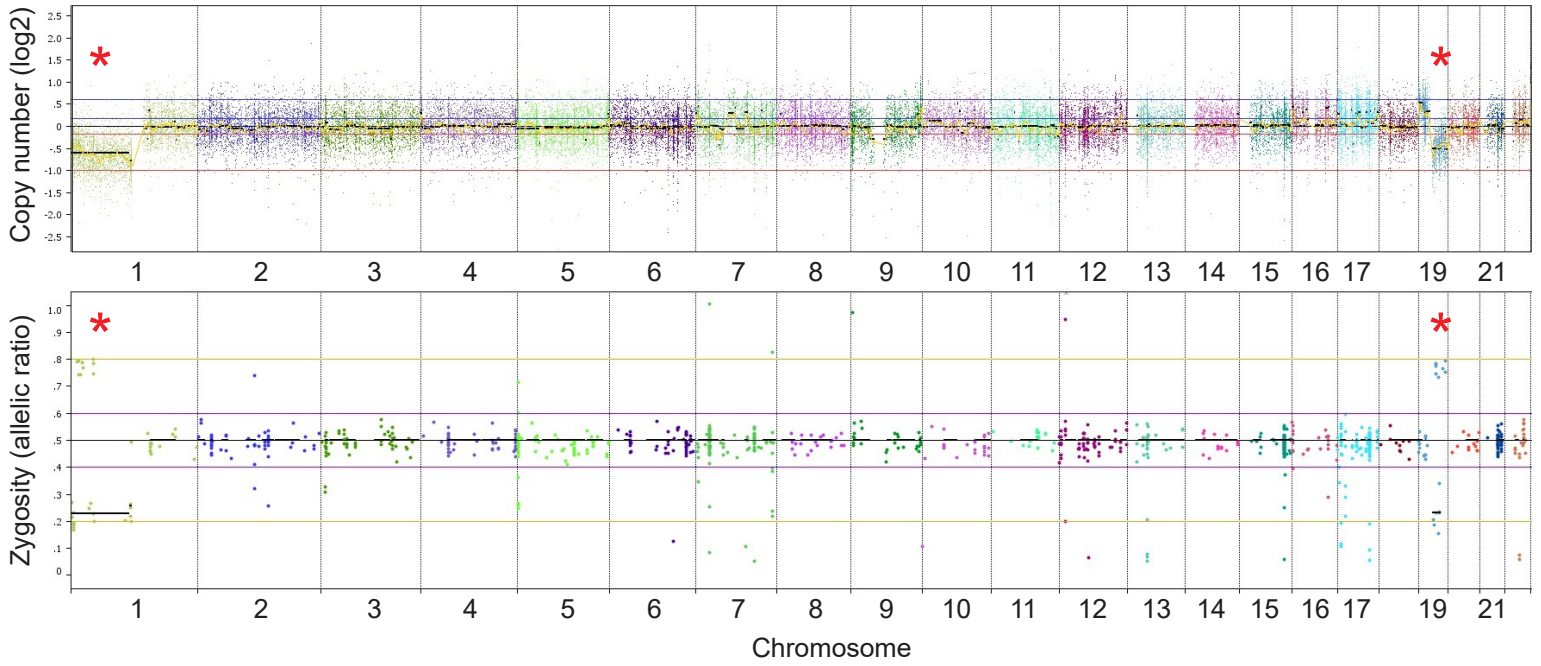

**Supplementary Figure 2.** Chromosomal copy number and zygosity plots for the oligodendroglioma, IDH-mutant and 1p/19q-codeleted, from teenage patient #2. Losses of the entire arms of chromosomes 1p and 19q are the solitary copy number changes present.
